# Supplementary material for: Decursinol Angelate Mitigates Sepsis Induced by Methicillin-Resistant Staphylococcus aureus Infection by Modulating the Inflammatory Responses of Macrophages
Source: MDPI journal article supplement (doi:10.3390/ijms222010950), 2021-10-11

## SUPPLEMENTAL INFORMATION

### **Decursinol angelate mitigates sepsis induced by methicillin-resistant *Staphylococcus aureus* infection by modulating the inflammatory responses of macrophages**

Seongwon Pak<sup>1, 3</sup>, Bikash Thapa<sup>2, 3</sup> and Keunwook Lee<sup>1, 2, \*</sup>

<sup>1</sup>Department of Biomedical Science and <sup>2</sup>Institute of Bioscience and Biotechnology, Hallym University, Chuncheon, 24252, Korea; <sup>3</sup> These authors contributed equally to this work

\* Correspondence: K.L.; Email. keunwook@hallym.ac.kr; Phone. +82-33-248-2113

**Supplemental Table S1.** Primer sequences used in the quantitative real-time PCR analysis

| Gene name   | Sequence (5' to 3')                            |
|-------------|------------------------------------------------|
| <i>Tnf</i>  | GATCGGTCCCCAAAGGGATG<br>CACTTGGTGGTTTGCTACGAC  |
| <i>Il6</i>  | GTTCTCTGGGAAATCGTGGA<br>TGTA CTCCAGGTAGCTATGG  |
| <i>Ccl2</i> | AACTGCATCTGCCCTAAGGT<br>AGGCATCACAGTCCGAGTCA   |
| <i>Nos2</i> | TCCTGGACATTACGACCCCT<br>CTCTGAGGGCTGACACAAGG   |
| <i>Actb</i> | GGCACCACACCTTCTACAATG<br>GGGGTGTTGAAGGTCTCAAAC |

## **Supplemental Figure Legend**

**Supplemental Figure S1.** Effect of DA on the MAPK signaling pathway. BMDMs were pretreated with 20  $\mu$ M DA followed by LPS stimulation over a time-course and analyzed by Western blotting with the indicated antibodies. Representative immunoblots from 2 independent experiments are shown. Immunoblotting for  $\alpha$ -tubulin and unphosphorylated proteins was used as a loading control.

Pak et al. Supplemental Figure S1

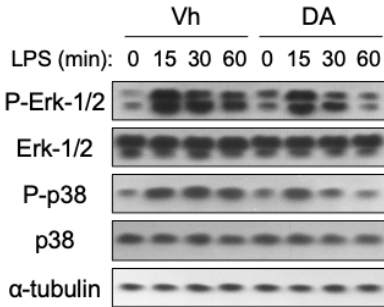

Supplement: s1 [file s1]
